# Supplementary material for: Integrating Genome-Wide Genetic Variations and Monocyte Expression Data Reveals Trans-Regulated Gene Modules in Humans
Source: PubMed Central journal article supplement (PMC3228821; doi:10.1371/journal.pgen.1002367), 2011-12-01

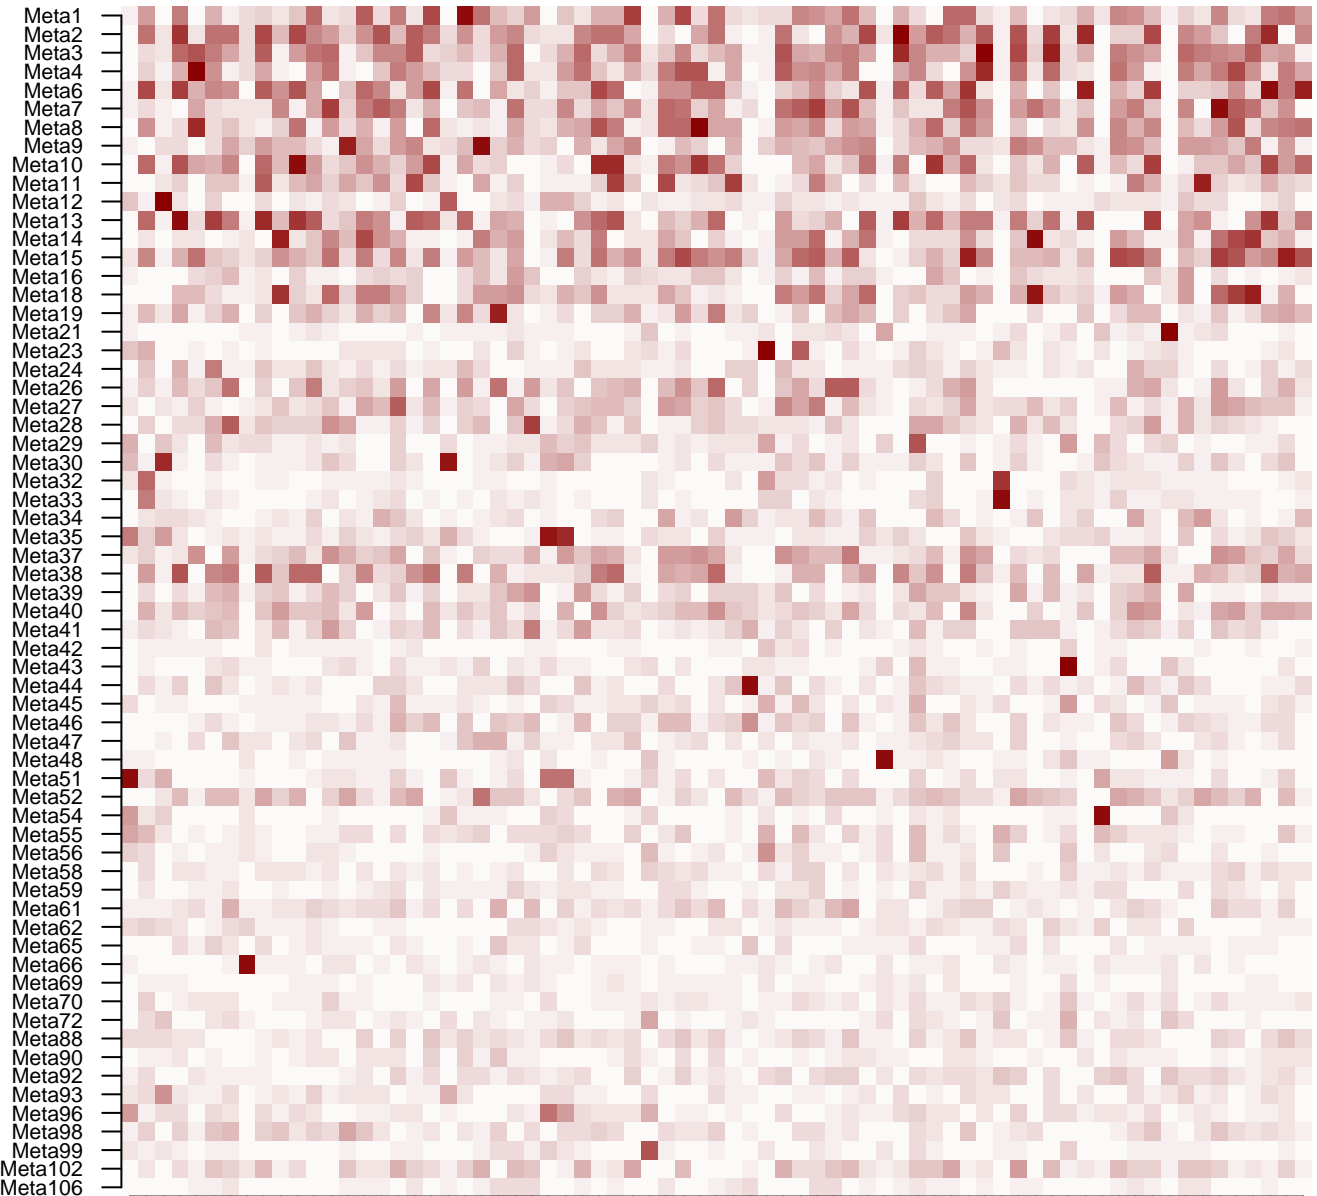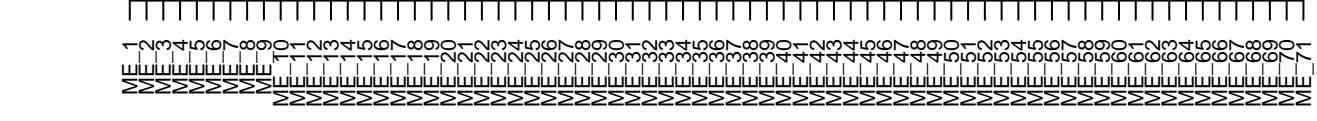

Supplement: pgen.1002367.s007.pdf [file pgen.1002367.s007.pdf]
